# Supplementary material for: Blood eosinophil count predicts treatment failure and hospital readmission for COPD
Source: ERJ Open Res. 2020 Nov 10;6(4):00188-2020. doi: 10.1183/23120541.00188-2020 (PMC7927786; doi:10.1183/23120541.00188-2020)
Supplement: Supplementary file 1 [file 00188-2020.SUPPLEMENT.pdf]

# **Blood Eosinophil Count Predicts Treatment Failure and Hospital**

## **Readmission for COPD**

Marjan Kerkhof<sup>1</sup>, Isha Chaudhry<sup>1</sup>, Ian D. Pavord<sup>2</sup>, Marc Miravittles<sup>3</sup>, Chin Kook Rhee<sup>4</sup>,  
David M.G. Halpin<sup>5</sup>, Omar S. Usmani<sup>6</sup>, Rupert Jones<sup>7</sup>, Janwillem Kocks<sup>1</sup>, Marianna  
Alacqua<sup>8</sup>, Tamsin Morris<sup>9</sup>, Alan Kaplan<sup>1,10</sup>, David B. Price<sup>1,11</sup>

<sup>1</sup>Observational and Pragmatic Research Institute, Singapore; <sup>2</sup>Oxford Respiratory NIHR BRC,  
Nuffield Department of Medicine, University of Oxford, Oxford, United Kingdom;

<sup>3</sup>Pneumology Department, Hospital Universitari Vall d'Hebron, CIBER de Enfermedades  
Respiratorias (CIBERES), Barcelona, Spain; <sup>4</sup>College of Medicine, Seoul St. Mary's  
Hospital, The Catholic University of Korea, Seoul, South Korea; <sup>5</sup>University of Exeter  
Medical School, College of Medicine and Health, University of Exeter, Exeter, United  
Kingdom; <sup>6</sup>Imperial College London, London, United Kingdom; <sup>7</sup>The Peninsula College of  
Medicine and Dentistry, Plymouth, United Kingdom; <sup>8</sup>AstraZeneca, Cambridge, United  
Kingdom; <sup>9</sup>AstraZeneca, Luton, United Kingdom; <sup>10</sup>Family Physician Airways Group of  
Canada, Richmond Hill, Ontario, Canada; <sup>11</sup>University of Aberdeen, Aberdeen, United  
Kingdom

## Table of Contents

|                                                                                                                                                                                                                               |    |
|-------------------------------------------------------------------------------------------------------------------------------------------------------------------------------------------------------------------------------|----|
| Table S1. Additional Baseline Patient Characteristics .....                                                                                                                                                                   | 3  |
| Table S2. Baseline Patient Maintenance Therapy by Blood Eosinophil Count Category .....                                                                                                                                       | 5  |
| Figure S1. Cohort 1 Patient Flow Diagram.....                                                                                                                                                                                 | 6  |
| Figure S2. Kaplan-Meier Curves for the Unadjusted Association Between Blood Eosinophil<br>Counts Recorded on the Day of an OCS-Treated Exacerbation and Time to First Outcome<br>Event Within 6 Weeks (Cohort 1).....         | 8  |
| Figure S3. Association Between Blood Eosinophil Counts Recorded on the Day of an OCS-<br>Treated Exacerbation and Treatment Failure Within 6 Weeks (Cohort 1) .....                                                           | 9  |
| Figure S4. Association Between Change in Blood Eosinophil Counts from an Exacerbation-<br>Free Period to Index Exacerbation Date and Treatment Failure Within 6 Weeks (Cohort 1) .....                                        | 11 |
| Figure S5. Association Between Blood Eosinophil Counts and Hospital Admission Within 6<br>Weeks (Cohort 1) or Readmission Within 4 Weeks (Cohort 2) Stratified by ICS Treatment in<br>the Prior Year .....                    | 13 |
| Figure S6. Association Between Blood Eosinophil Counts and Treatment Failure Outcomes<br>Within 6 Weeks, Stratified by ICS Treatment (Cohort 1).....                                                                          | 14 |
| Figure S7. Cohort 2 Patient Flow Diagram.....                                                                                                                                                                                 | 16 |
| Figure S8. Kaplan-Meier Curves for the Unadjusted Association Between Blood Eosinophil<br>Counts Recorded During an Exacerbation-Free Period and Time to First Hospital<br>Readmission for COPD Exacerbation (Cohort 2) ..... | 17 |

**Table S1. Additional Baseline Patient Characteristics**

| <b>Variable</b>                                                | <b>Cohort 1<br/>(N=6,416)</b> | <b>Cohort 2<br/>(N=10,245)</b> |
|----------------------------------------------------------------|-------------------------------|--------------------------------|
| Charlson comorbidity index                                     |                               |                                |
| ≤1                                                             | 4,023 (62.7)                  | 6,199 (60.5)                   |
| 2–4                                                            | 1,344 (20.9)                  | 1,730 (16.9)                   |
| 5+                                                             | 1,049 (16.3)                  | 2,316 (22.6)                   |
| Maintenance therapy                                            |                               |                                |
| None                                                           | 755 (11.8)                    | 1,253 (12.2)                   |
| Short-acting BD only                                           | 592 (9.2)                     | 687 (6.7)                      |
| Long-acting BD only                                            | 680 (10.6)                    | 1,232 (12.0)                   |
| ICS+LABA                                                       | 1,500 (23.4)                  | 2,674 (26.1)                   |
| Triple therapy                                                 | 2,889 (45.0)                  | 4,399 (42.9)                   |
| Daily ICS dosage, median (IQR) <sup>a</sup>                    | 361.7 (82.0–721.3)            | 393.5 (92.9–739.8)             |
| ≥1 SABA inhaler prescribed                                     | 4,687 (73.1)                  | 7,594 (74.1)                   |
| ≥1 SAMA inhaler prescribed                                     | 1,066 (16.6)                  | 3,563 (34.8)                   |
| Cumulative average daily OCS dosage, median (IQR) <sup>b</sup> | 1.5 (0.8–2.9)                 | 0.4 (0.0–1.4)                  |
| Number of COPD exacerbations <sup>c</sup>                      |                               |                                |
| 0                                                              | 0 (0)                         | 0 (0)                          |
| 1                                                              | 520 (8.1)                     | 2,348 (22.9)                   |
| 2                                                              | 2,331 (36.3)                  | 2,325 (22.7)                   |
| 3                                                              | 1,155 (18.0)                  | 1,831 (17.9)                   |
| ≥4                                                             | 2,410 (37.6)                  | 3,741 (36.5)                   |
| Number of short-term OCS courses <sup>c</sup>                  |                               |                                |
| 0                                                              | 0 (0)                         | 4,796 (46.8)                   |
| 1                                                              | 1,946 (30.3)                  | 2,332 (22.8)                   |
| 2                                                              | 1,225 (19.1)                  | 1,215 (11.9)                   |
| 3                                                              | 945 (14.7)                    | 753 (7.3)                      |
| ≥4                                                             | 2,300 (35.8)                  | 1,149 (11.2)                   |
| mMRC dyspnoea score                                            |                               |                                |
| n                                                              | 5,460                         | 8,789                          |
| 0                                                              | 409 (7.5)                     | 314 (3.6)                      |
| 1                                                              | 2,256 (41.3)                  | 3,883 (44.2)                   |
| 2                                                              | 1,527 (28.0)                  | 1,976 (22.5)                   |
| 3                                                              | 1,030 (18.9)                  | 1,823 (20.7)                   |
| 4                                                              | 238 (4.4)                     | 793 (9.0)                      |

BD, bronchodilator; COPD, chronic obstructive pulmonary disease; ICS, inhaled

corticosteroids; IQR, interquartile range; LABA, long-acting  $\beta_2$ -agonists; mMRC, modified

Medical Research Council; OCS, oral corticosteroids; SABA, short-acting  $\beta_2$ -agonists;

SAMA, short-acting muscarinic antagonists.

Data expressed as n (%) unless otherwise noted.

<sup>a</sup>ICS dosage expressed as fluticasone propionate or equivalent (μg).

<sup>b</sup>OCS dosage expressed as prednisolone or equivalent (mg).

<sup>c</sup>Including exacerbation on index date.

**Table S2. Baseline Patient Maintenance Therapy by Blood Eosinophil Count Category**

|                       |                      | Blood eosinophil category (cells/μL) |                      |                      |                      |                      |                      |                      |                      |
|-----------------------|----------------------|--------------------------------------|----------------------|----------------------|----------------------|----------------------|----------------------|----------------------|----------------------|
|                       |                      | <50                                  | 50–<150              | 150–<250             | 250–<350             | 350–<450             | 450–<550             | 550–<650             | ≥650                 |
| Cohort 1              |                      | (n=275)                              | (n=2048)             | (n=1768)             | (n=1033)             | (n=502)              | (n=287)              | (n=169)              | (n=334)              |
| Maintenance therapy   | None                 | 37 (13.5)                            | 262 (12.8)           | 209 (11.8)           | 107 (10.4)           | 54 (10.8)            | 33 (11.5)            | 15 (8.9)             | 38 (11.4)            |
|                       | Short-acting BD only | 30 (10.9)                            | 193 (9.4)            | 145 (8.2)            | 106 (10.3)           | 45 (9.0)             | 30 (10.5)            | 16 (9.5)             | 27 (8.1)             |
|                       | Long-acting BD only  | 35 (12.7)                            | 220 (10.7)           | 180 (10.2)           | 97 (9.4)             | 46 (9.2)             | 33 (11.5)            | 27 (16.0)            | 42 (12.6)            |
|                       | ICS+LABA             | 58 (21.1)                            | 451 (22.0)           | 440 (24.9)           | 240 (23.2)           | 118 (23.5)           | 69 (24.0)            | 37 (21.9)            | 87 (26.0)            |
|                       | Triple therapy       | 115 (41.8)                           | 922 (45.0)           | 794 (44.9)           | 483 (46.8)           | 239 (47.6)           | 122 (42.5)           | 74 (43.8)            | 140 (41.9)           |
| ICS mean daily dosage | Median (IQR)         | 731.5 (114.8–1530.1)                 | 786.9 (164.4–1528.8) | 794.0 (246.6–1506.8) | 746.9 (197.0–1479.5) | 788.0 (163.9–1479.5) | 731.5 (164.4–1315.1) | 657.5 (164.4–1315.1) | 739.7 (164.4–1475.4) |
|                       |                      | Cohort 2                             |                      | (n=734)              | (n=3035)             | (n=2794)             | (n=1608)             | (n=834)              | (n=480)              |
| Maintenance therapy   | None                 | 108 (14.7)                           | 399 (13.1)           | 314 (11.2)           | 196 (12.2)           | 93 (11.2)            | 53 (11.0)            | 24 (10.3)            | 66 (12.5)            |
|                       | Short-acting BD only | 53 (7.2)                             | 200 (6.6)            | 166 (5.9)            | 103 (6.4)            | 79 (9.5)             | 30 (6.3)             | 21 (9.0)             | 35 (6.7)             |
|                       | Long-acting BD only  | 83 (11.3)                            | 368 (12.1)           | 363 (13.0)           | 179 (11.1)           | 85 (10.2)            | 53 (11.0)            | 27 (11.5)            | 74 (14.1)            |
|                       | ICS+LABA             | 200 (27.2)                           | 778 (25.6)           | 696 (24.9)           | 447 (27.8)           | 209 (25.1)           | 126 (26.3)           | 61 (26.1)            | 157 (29.8)           |
|                       | Triple therapy       | 290 (39.5)                           | 1,290 (42.5)         | 1,255 (44.9)         | 683 (42.5)           | 368 (44.1)           | 218 (45.4)           | 101 (43.2)           | 194 (36.9)           |
| ICS mean daily dosage | Median (IQR)         | 657.5 (54.8–1315.1)                  | 723.3 (109.6–1479.5) | 737.7 (164.4–1444.6) | 710.4 (163.9–1315.1) | 690.4 (164.4–1479.5) | 657.5 (109.6–1315.1) | 684.9 (137.0–1315.1) | 657.5 (164.4–1479.5) |

BD, bronchodilator; ICS, inhaled corticosteroids; IQR, interquartile range; LABA, long-acting  $\beta_2$ -agonists.

**Figure S1. Cohort 1 Patient Flow Diagram**

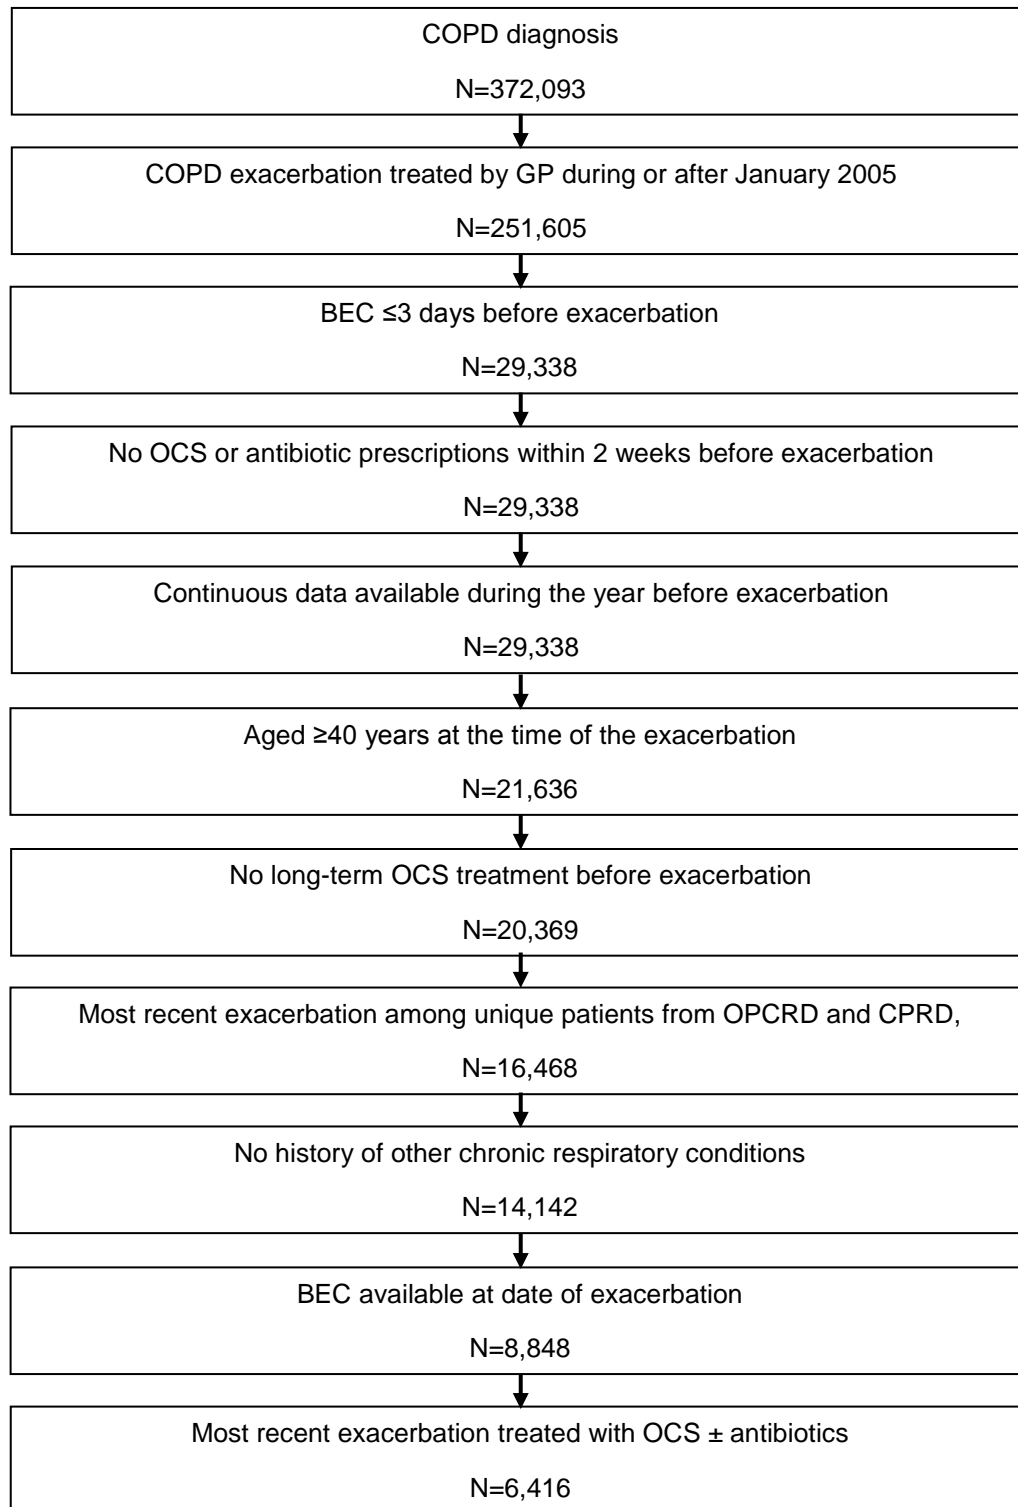

BEC, blood eosinophil counts; CPRD, Clinical Practice Research Datalink; COPD, chronic obstructive pulmonary disease; GP, general practitioner; OCS, oral corticosteroids; OPCR, Optimum Patient Care Research Database.

**Figure S2. Kaplan-Meier Curves for the Unadjusted Association Between Blood Eosinophil Counts Recorded on the Day of an OCS-Treated Exacerbation and Time to First Outcome Event Within 6 Weeks (Cohort 1)**

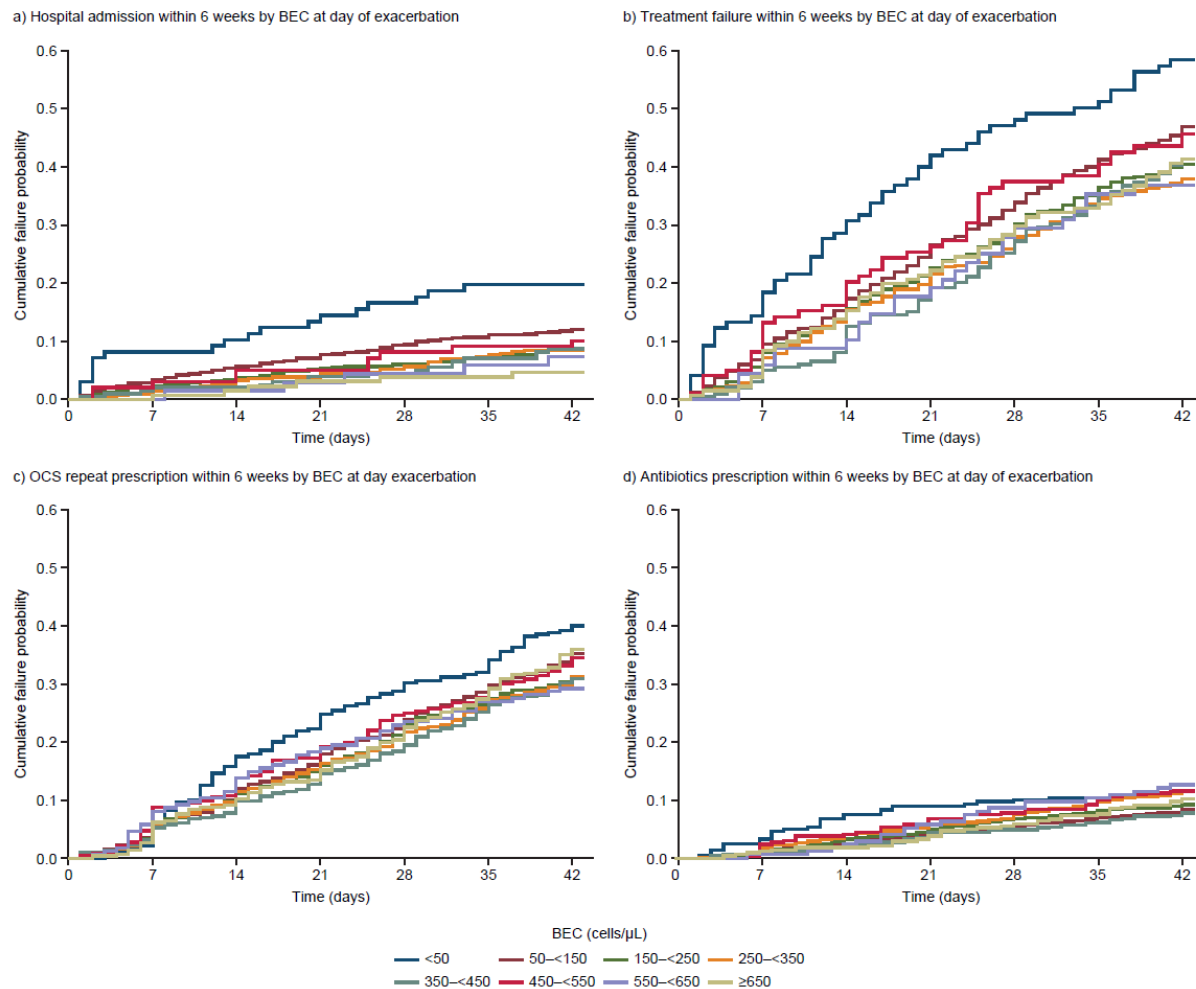

Panel a: Hospital admission. Panel b: Treatment failure. Panel c: OCS prescription.

Panel d: Antibiotic prescription.

BEC, blood eosinophil counts; OCS, oral corticosteroids.

BEC are classified in incremental categories with 50—<150 cells/ $\mu$ L as the reference category.

**Figure S3. Association Between Blood Eosinophil Counts Recorded on the Day of an OCS-Treated Exacerbation and Treatment Failure Within 6 Weeks (Cohort 1)**

**a) Treatment failure within 6 weeks by BEC at day of exacerbation**

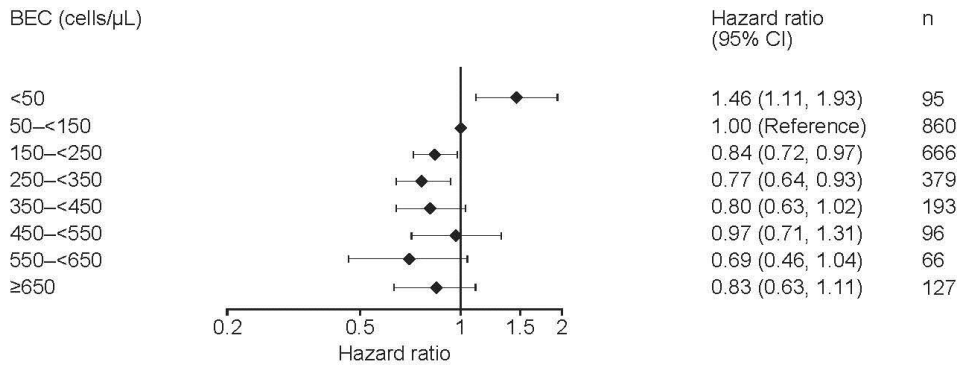

**b) OCS repeat prescription within 6 weeks by BEC at day of exacerbation**

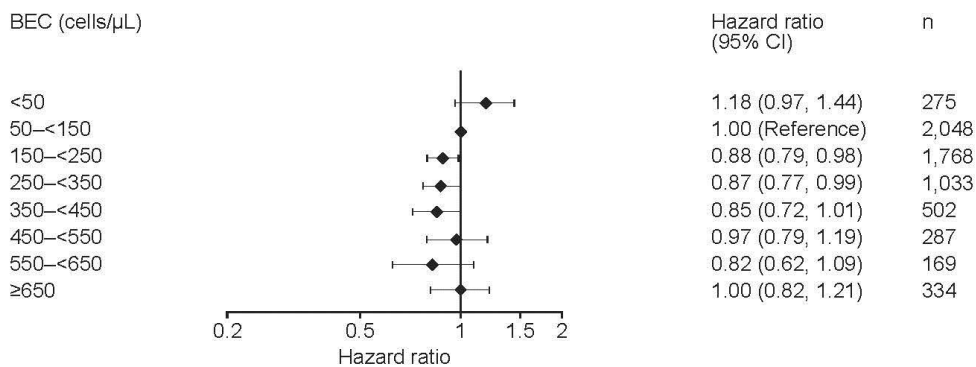

**c) Antibiotics prescription within 6 weeks by BEC at day of exacerbation**

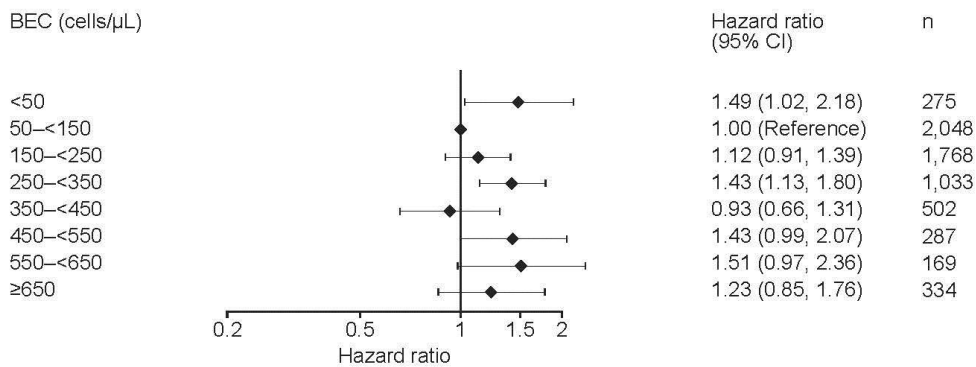

Panel a: Overall treatment failure (N=2,482). Panel b: Treatment failure defined as a repeat OCS prescription (N=6,416). Panel c: Treatment failure defined as an antibiotic prescription (N=6,416).

BEC, blood eosinophil counts; CI, confidence interval; OCS, oral corticosteroids.

**Figure S4. Association Between Change in Blood Eosinophil Counts from an Exacerbation-Free Period to Index Exacerbation Date and Treatment Failure Within 6 Weeks (Cohort 1)**

**a) Treatment failure within 6 weeks by BEC at exacerbation vs. exacerbation-free period**

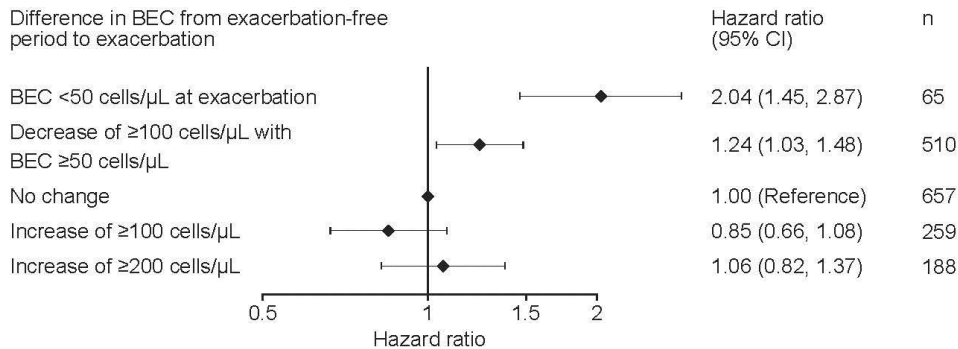

**b) OCS repeat prescription within 6 weeks by BEC at exacerbation vs. exacerbation-free period**

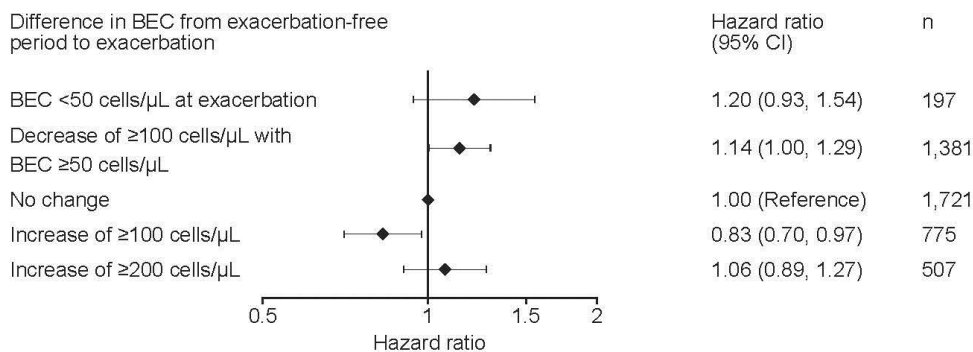

**c) Antibiotics prescription within 6 weeks by BEC at exacerbation vs. exacerbation-free period**

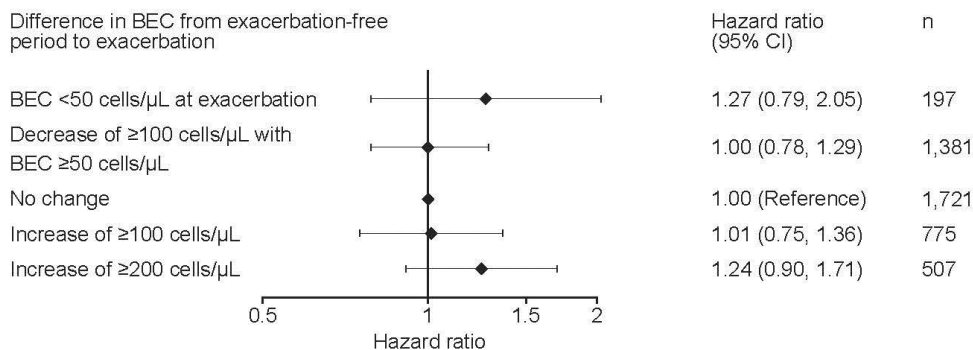

Panel a: Overall treatment failure. Panel b: Treatment failure defined as a repeat OCS prescription. Panel c: Treatment failure defined as an antibiotic prescription.

BEC, blood eosinophil counts; CI, confidence interval; OCS, oral corticosteroids.

An exacerbation-free period is defined as at least 4 weeks before any COPD exacerbations.

**Figure S5. Association Between Blood Eosinophil Counts and Hospital Admission Within 6 Weeks (Cohort 1) or Readmission Within 4 Weeks (Cohort 2) Stratified by ICS Treatment in the Prior Year**

**a) Hospital admission within 6 weeks by BEC at day of exacerbation**

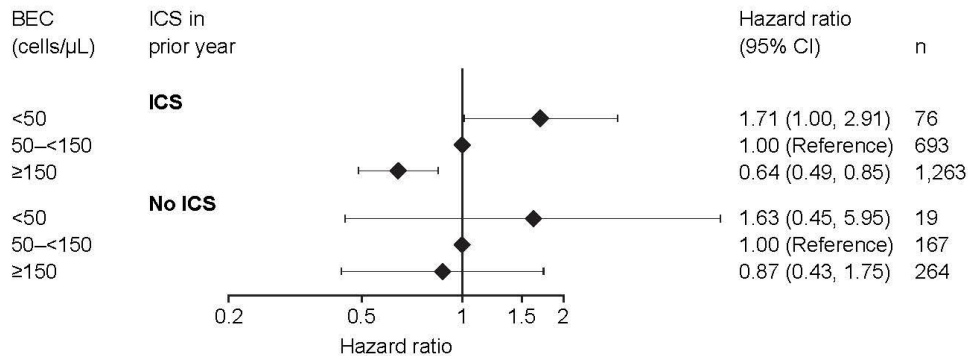

**b) Hospital readmission within 4 weeks by BEC during exacerbation-free period in prior year**

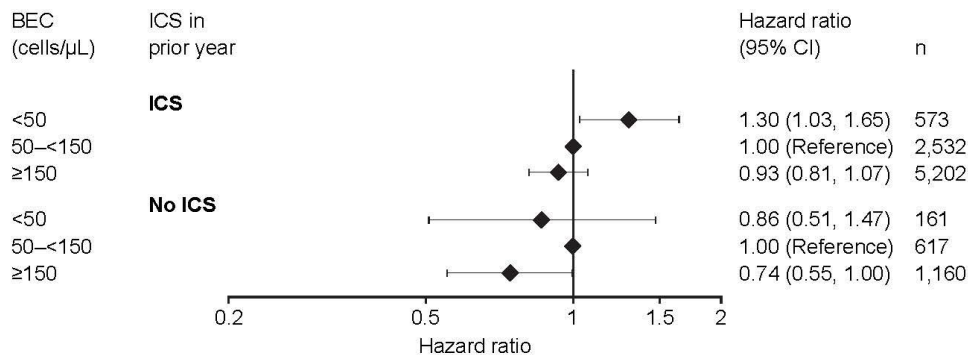

Panel a: Association between BEC recorded on the day of an exacerbation and hospital admission within 6 weeks for Cohort 1. Panel b: Association between BEC recorded during stable disease (no exacerbations within 4 weeks) and hospital readmission within 6 weeks for Cohort 2.

BEC, blood eosinophil counts; CI, confidence interval; ICS, inhaled corticosteroids.

**Figure S6. Association Between Blood Eosinophil Counts and Treatment Failure Outcomes**  
**Within 6 Weeks, Stratified by ICS Treatment (Cohort 1)**

**a) Treatment failure within 6 weeks by BEC at day of exacerbation**

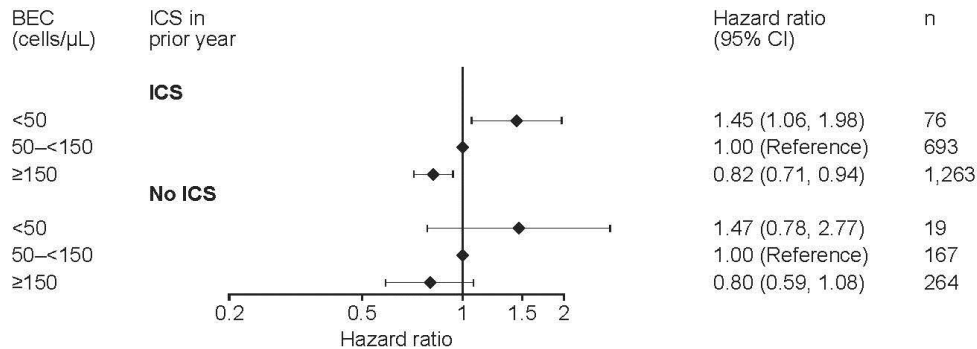

**b) OCS repeat prescription within 6 weeks by BEC at day of exacerbation**

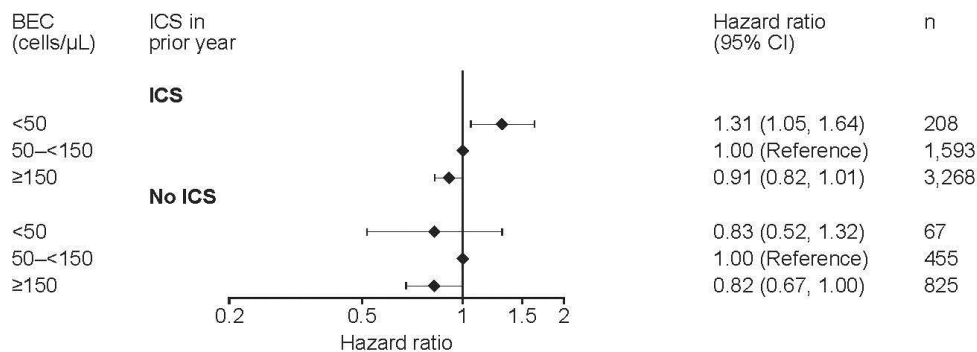

**c) Antibiotics prescription within 6 weeks by BEC at day of exacerbation**

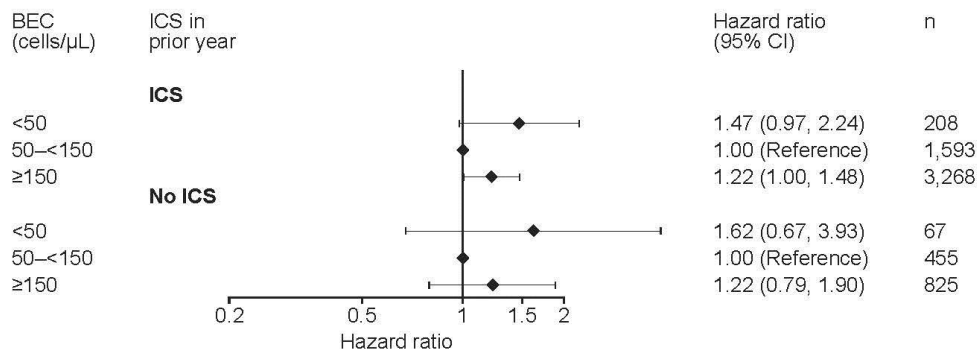

Panel a: Overall treatment failure. Panel b: Treatment failure defined as a repeat OCS prescription. Panel c: Treatment failure defined as an antibiotic prescription.

BEC, blood eosinophil counts; CI, confidence interval; ICS, inhaled corticosteroids; OCS, oral corticosteroids.

Reference range for BEC was 50–<150 cells/ $\mu$ L.

**Figure S7. Cohort 2 Patient Flow Diagram**

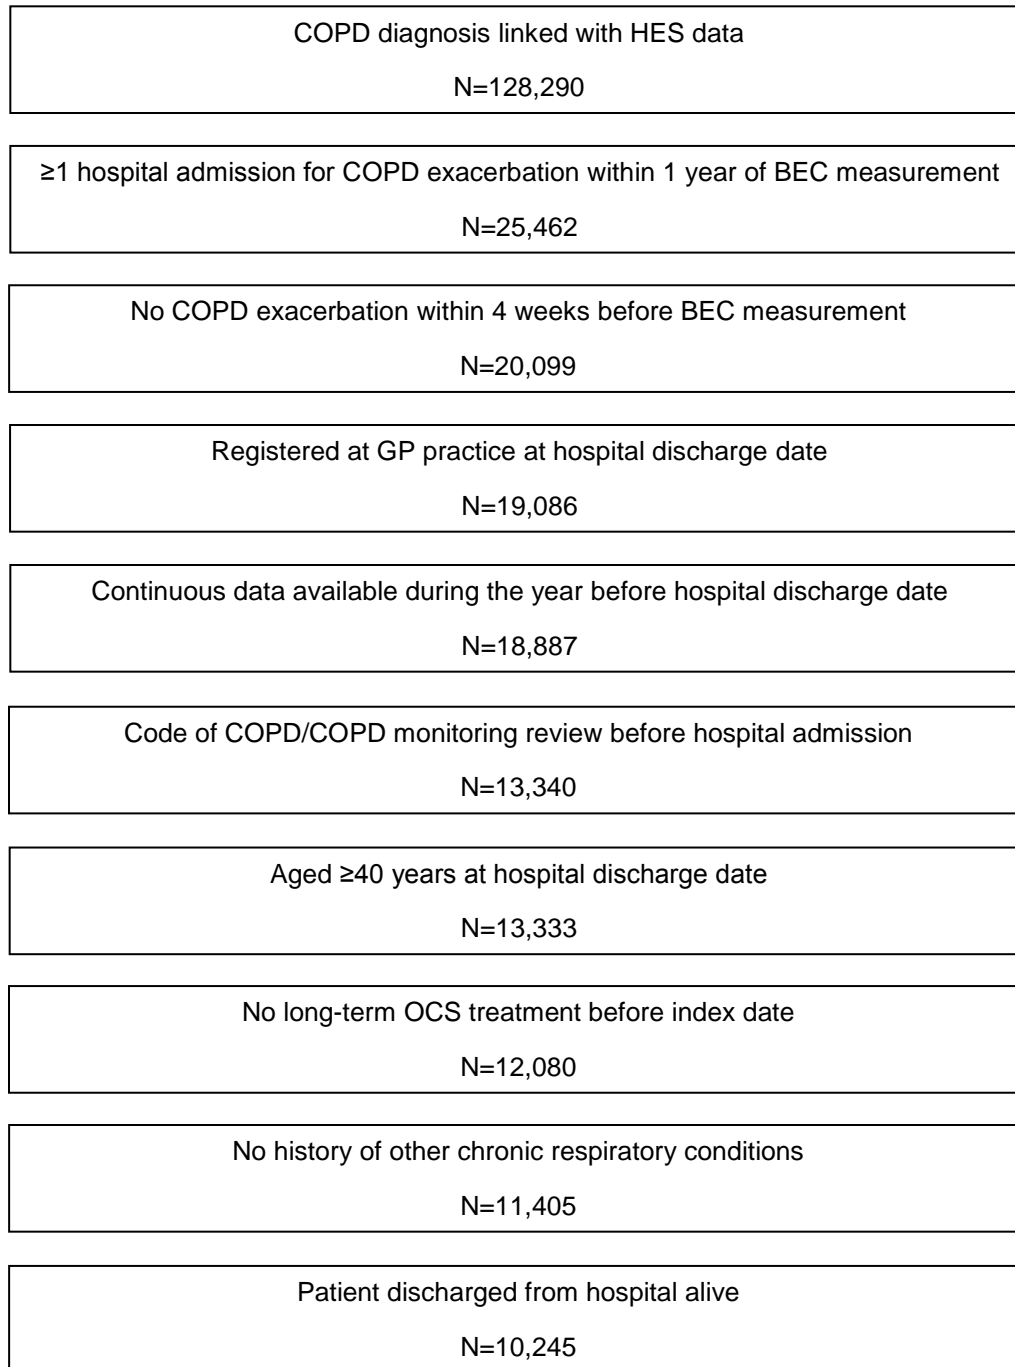

BEC, blood eosinophil counts; COPD, chronic obstructive pulmonary disease; GP, general practitioner; HES, Hospital Episode Statistics; OCS, oral corticosteroids.

**Figure S8. Kaplan-Meier Curves for the Unadjusted Association Between Blood Eosinophil Counts Recorded During an Exacerbation-Free Period and Time to First Hospital Readmission for COPD Exacerbation (Cohort 2)**

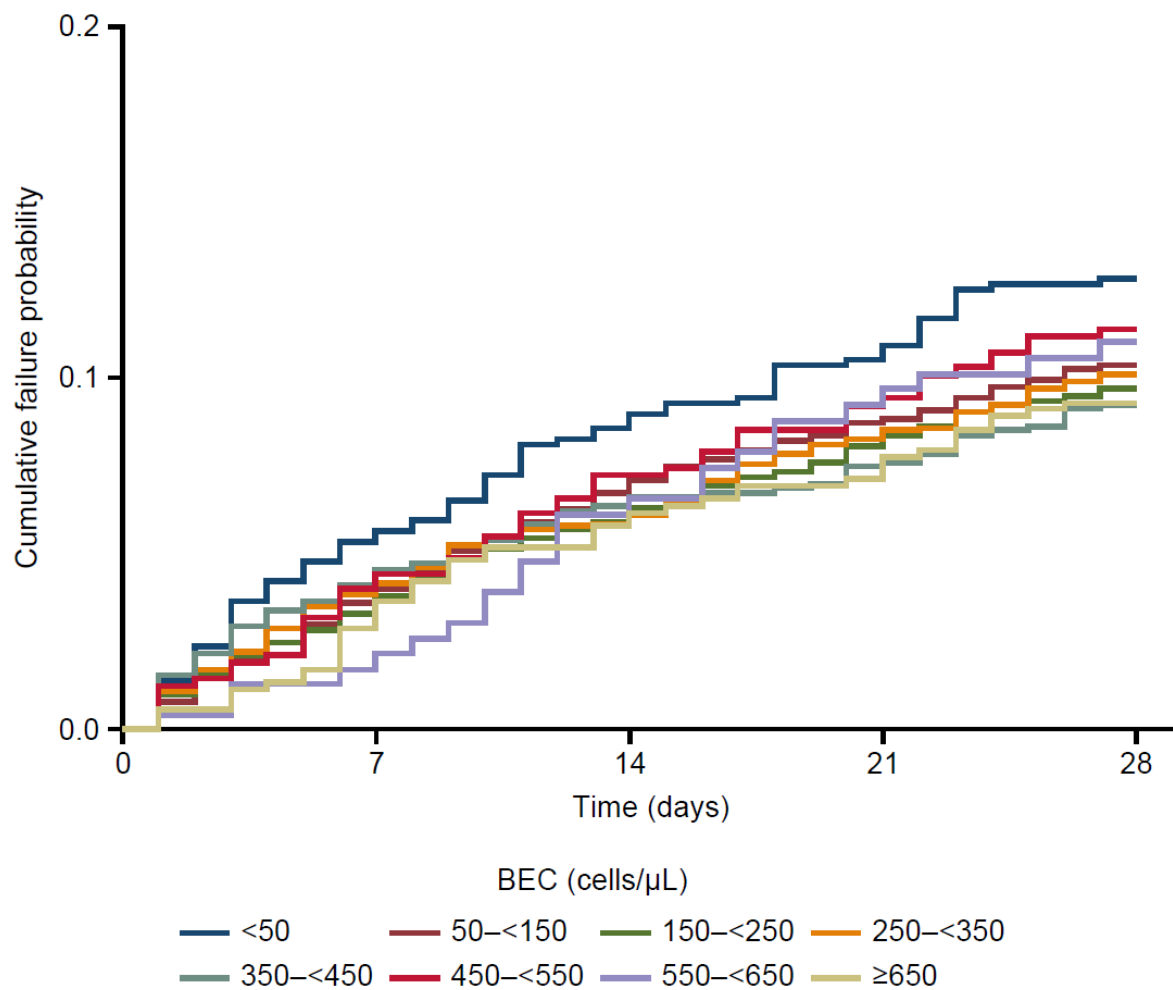

BEC, blood eosinophil counts; COPD, chronic obstructive pulmonary disease.

An exacerbation-free period was defined as at least 4 weeks before any COPD exacerbations.
